# Supplementary material for: Impact of the 24-hour time target policy for emergency departments in South Korea: a mixed method study in a single medical center
Source: Springer Nature journal article supplement (doi:10.1186/s12913-022-08861-y), 2022-12-12
Supplement: MOESM1 [file 23816216]

**Supplementary Table 1. Survey**

**A. Patient flow**

Please indicate your evaluation of changes in the emergency department after implementing the 24-hour time target policy for each sentence.

|                                                |                       |          |                  |          |               |
|------------------------------------------------|-----------------------|----------|------------------|----------|---------------|
| 1. Overall process                             | Considerable worsened | Worsened | Not that changed | Improved | Very improved |
| 2. Triage process                              | Considerable worsened | Worsened | Not that changed | Improved | Very improved |
| 3. Diagnostic evaluation and treatment process | Considerable worsened | Worsened | Not that changed | Improved | Very improved |
| 4. Disposition process                         | Considerable worsened | Worsened | Not that changed | Improved | Very improved |

5. Please feel free to write your opinion of the patient flow of the emergency department after implementing the 24-hour time target policy.

---

**B. Quality of Care**

Please indicate your evaluation of changes in the emergency department after implementing the 24-hour time target policy for each sentence.

|                                                                                              |                       |          |                  |          |               |
|----------------------------------------------------------------------------------------------|-----------------------|----------|------------------|----------|---------------|
| 6. Patient-centered<br>Is responsive to individual patient preferences, needs, and values    | Considerable worsened | Worsened | Not that changed | Improved | Very improved |
| 7. Safe<br>Prevents harm from treatment to help patients.                                    | Considerable worsened | Worsened | Not that changed | Improved | Very improved |
| 8. Effective<br>Is based on scientific knowledge                                             | Considerable worsened | Worsened | Not that changed | Improved | Very improved |
| 9. Timely<br>Minimizes waits and potentially harmful delays                                  | Considerable worsened | Worsened | Not that changed | Improved | Very improved |
| 10. Efficient<br>Ensures cost-effective care (avoids waste, overuse, and misuse of services) | Considerable worsened | Worsened | Not that changed | Improved | Very improved |

|                                                                                                                                                   |                       |          |                  |          |               |
|---------------------------------------------------------------------------------------------------------------------------------------------------|-----------------------|----------|------------------|----------|---------------|
| 11. Equitable<br>Provides the same quality of care to all individuals regardless of gender, race, ethnicity, socioeconomic status, language, etc. | Considerable worsened | Worsened | Not that changed | Improved | Very improved |
|---------------------------------------------------------------------------------------------------------------------------------------------------|-----------------------|----------|------------------|----------|---------------|

12. Please feel free to write your opinion of the quality of care of the emergency department after implementing the 24-hour time target policy.

---

**C. Patient Safety**

Please indicate your evaluation of changes in the emergency department after implementing the 24-hour time target policy for each sentence.

|                                                                                              |                       |          |                  |          |               |
|----------------------------------------------------------------------------------------------|-----------------------|----------|------------------|----------|---------------|
| 13. Patient identification                                                                   | Considerable worsened | Worsened | Not that changed | Improved | Very improved |
| 14. Pressure ulcer                                                                           | Considerable worsened | Worsened | Not that changed | Improved | Very improved |
| 15. Falls                                                                                    | Considerable worsened | Worsened | Not that changed | Improved | Very improved |
| 16. Medication                                                                               | Considerable worsened | Worsened | Not that changed | Improved | Very improved |
| 17. Diagnostic test                                                                          | Considerable worsened | Worsened | Not that changed | Improved | Very improved |
| 18. Treatment                                                                                | Considerable worsened | Worsened | Not that changed | Improved | Very improved |
| 19. Others (infection-related, medical equipment, escape, violence, blood transfusion, etc.) | Considerable worsened | Worsened | Not that changed | Improved | Very improved |

20. Please feel free to write your opinion of the patient safety of the emergency department after implementing the 24-hour time target policy.

---

#### D. Workload

Please indicate your evaluation of changes in the emergency department after implementing the 24-hour time target policy for each sentence.

|                                                                                            |                       |          |                  |          |               |
|--------------------------------------------------------------------------------------------|-----------------------|----------|------------------|----------|---------------|
| 21. Mental demand<br>- How mentally demanding was the task?                                | Considerable worsened | Worsened | Not that changed | Improved | Very improved |
| 22. Physical demand<br>- How physically demanding was the task?                            | Considerable worsened | Worsened | Not that changed | Improved | Very improved |
| 23. Temporal demand<br>- How hurried or rushed was the pace of the task?                   | Considerable worsened | Worsened | Not that changed | Improved | Very improved |
| 24. Performance<br>- How successful were you in accomplishing what you were asked to do?   | Considerable worsened | Worsened | Not that changed | Improved | Very improved |
| 25. Effort<br>- How hard did you have to work to accomplish your level of performance?     | Considerable worsened | Worsened | Not that changed | Improved | Very improved |
| 26. Frustration<br>- How insecure, discouraged, irritated, stressed, and annoyed were you? | Considerable worsened | Worsened | Not that changed | Improved | Very improved |

27. Please feel free to write your opinion of the workload of the emergency department after implementing the 24-hour time target policy.

---

#### E. Need for improvement of the policy

Please indicate your assessment of the additional need for improvement to reduce the length of stay in the emergency department.

|                                     |                   |          |                            |       |                |
|-------------------------------------|-------------------|----------|----------------------------|-------|----------------|
| 28. Triage                          | Strongly disagree | Disagree | Neither agree nor disagree | Agree | Strongly Agree |
| 29. Diagnosis and treatment         | Strongly disagree | Disagree | Neither agree nor disagree | Agree | Strongly Agree |
| 30. Decision of the main department | Strongly disagree | Disagree | Neither agree nor disagree | Agree | Strongly Agree |
| 31. Discharge                       | Strongly disagree | Disagree | Neither agree nor disagree | Agree | Strongly Agree |

32. Please feel free to write your opinion of the process that needs improvement to reduce the length of stay in the emergency department.

---

**F. Satisfaction with the policy**

Please indicate your evaluation of satisfaction with the 24-hour time target policy.

|                          |                     |                |                                         |              |                   |
|--------------------------|---------------------|----------------|-----------------------------------------|--------------|-------------------|
| 33. Overall satisfaction | Very unsatisfactory | Unsatisfactory | Neither satisfactory nor unsatisfactory | Satisfactory | Very satisfactory |
|--------------------------|---------------------|----------------|-----------------------------------------|--------------|-------------------|

34. Please feel free to write your opinion about the satisfaction with the 24-hour time target policy

---

**Supplementary Table 2. Comparison emergency department length of stay between before and after policy by each KTAS group**

|                       | <b>Before policy<br/>implementation<br/>(N = 81,922)</b> | <b>After policy<br/>implementation<br/>(N = 99,798)</b> | <b><i>P</i>-value</b> |
|-----------------------|----------------------------------------------------------|---------------------------------------------------------|-----------------------|
| Triage category: KTAS |                                                          |                                                         |                       |
| 1 (Resuscitation)     | 4.15                                                     | 2.40                                                    | <.001                 |
| 2 (Emergency)         | 5.03                                                     | 6.12                                                    | <.001                 |
| 3 (Urgent)            | 5.00                                                     | 5.80                                                    | <.001                 |
| 4 (Semi-urgent)       | 3.18                                                     | 3.63                                                    | <.001                 |
| 5 (Non-urgent)        | 2.47                                                     | 2.55                                                    | <.001                 |
| Missing               | 1.62                                                     | 1.52                                                    | .201                  |

*Note.* N=181,720. All data are presented as hours. The comparison of length of stay between pre- and post-policy implementation applied the Mann–Whitney U test for continuous variables that were not normally distributed. P-values < 0.05 were considered statistically significant.

KTAS: Korean Triage and Acuity Scale

**Except KTAS 1 group, LOS had increased in after policy implementation.**

**Supplementary Fig 1. Patient distribution: time spent on first prescription, admission decision, computed tomography, and magnetic resonance imaging.**

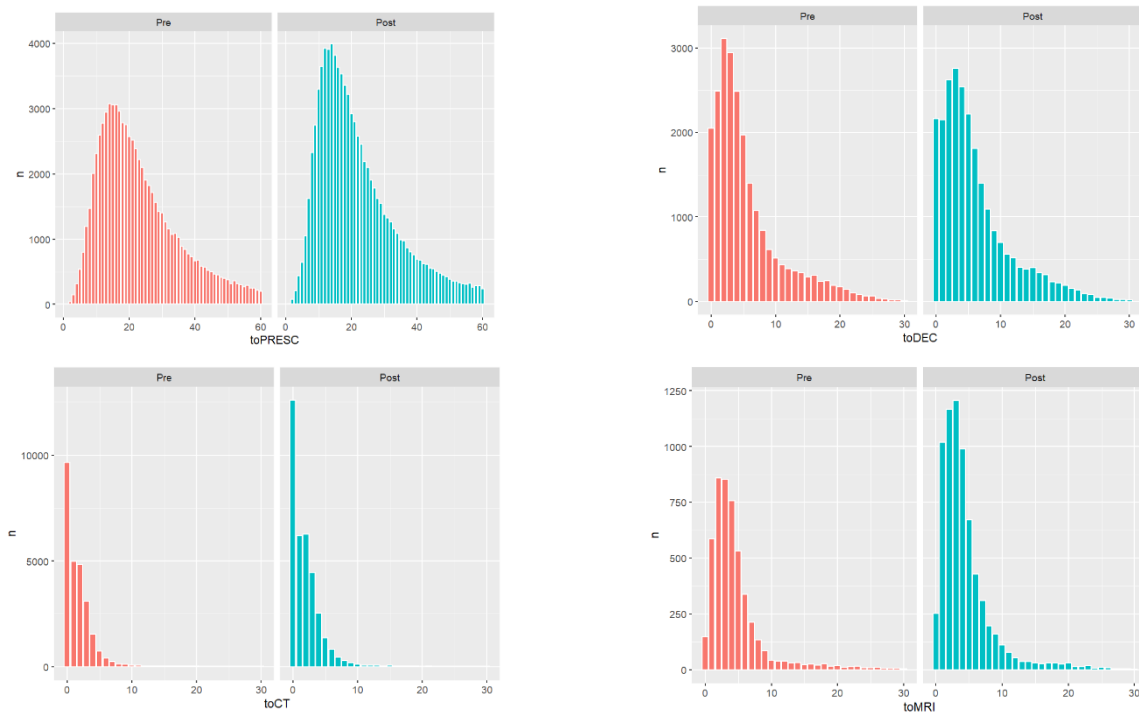

**Figure shows time spent on each clinical action. toPRESC: to first prescription, toDEC: to admission decision, toCT: to computed tomography (CT), toMRI: to magnetic resonance imaging. In the case of time to the first prescription, it was described on basis of minute units, and the other three were described on basis of hour units.**

## Supplementary Fig 2. The number of patients whose disposition was decided at 23 hours

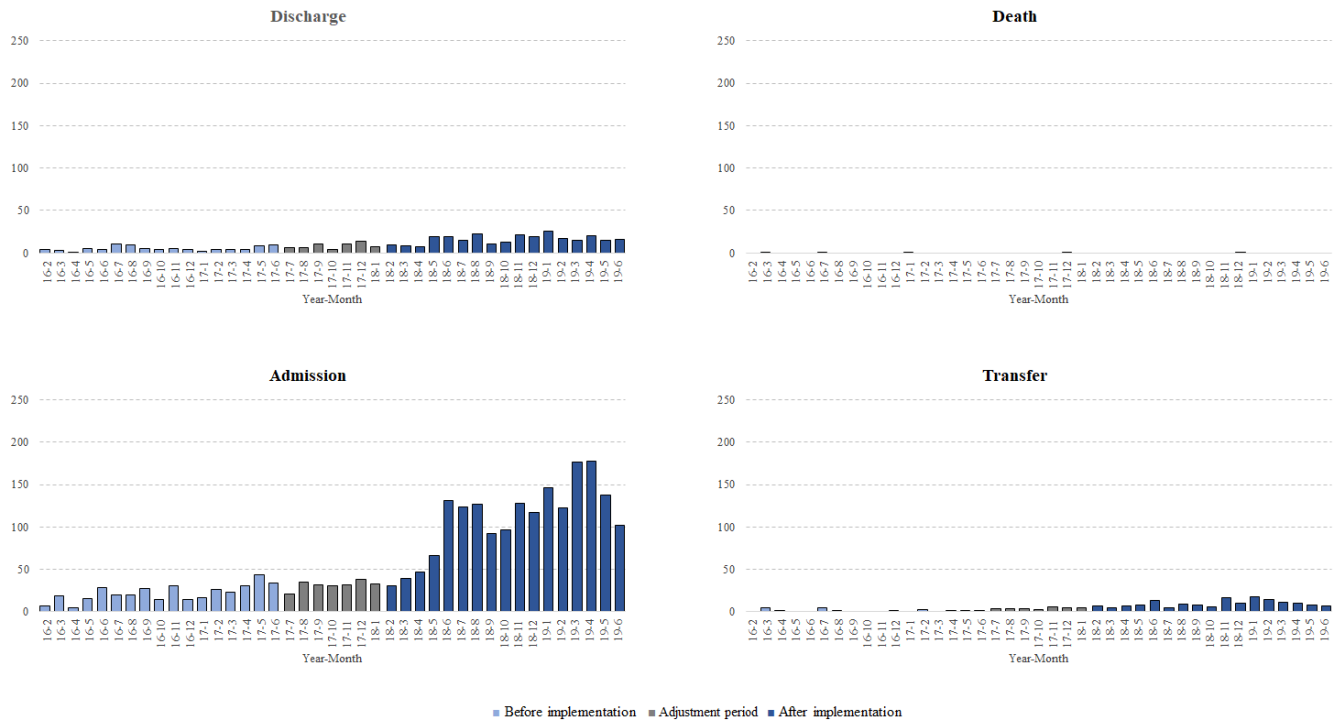

Figures show patient discharge, admission, death, and transfer rates at 23 hours by month.

**Supplementary Table 3. Demographic data for survey participants**

|               | Doctor<br>(N=22) | Nurse<br>(N=39) |
|---------------|------------------|-----------------|
| Demographic   |                  |                 |
| Age (years)   | 35.5 ± 3.1       | 32 ± 4.4        |
| Sex           |                  |                 |
| Female        | 10 (45.5%)       | 33 (84.6%)      |
| Male          | 12 (54.5%)       | 6 (15.4%)       |
| Department    |                  |                 |
| Emergency     | 16 (72.7%)       | 36 (92.3%)      |
| Others        | 6 (27.3%)        | 3 (7.7%)        |
| Working years | 8.2 ± 3.9        | 5.8 ± 2.9       |

*Note.* N=61. Age and working years were reported as means and standard deviations, SDs.

Other data were reported as numbers (percentages, %).



**Supplementary Table 4. Answers to survey part A-D. “Evaluation of changes in ED after implementing the policy”**

|                                                | Considerable<br>Worsened | Worsened  | Not that<br>Changed | Improved  | Very<br>improved |
|------------------------------------------------|--------------------------|-----------|---------------------|-----------|------------------|
| <b>Patient Flow</b>                            |                          |           |                     |           |                  |
| Overall process                                | 2 (3.3)                  | 6 (9.8)   | 14 (23.0)           | 34 (55.7) | 5 (8.2)          |
| Triage process                                 | 3 (4.9)                  | 8 (13.1)  | 36 (59.0)           | 13 (21.3) | 1 (1.6)          |
| Diagnostic evaluation and<br>treatment process | 2 (3.3)                  | 6 (9.8)   | 10 (16.4)           | 38 (62.3) | 5 (8.2)          |
| Disposition process                            | 5 (8.2)                  | 2 (3.3)   | 6 (9.8)             | 38 (62.3) | 10 (16.4)        |
| <b>Quality of Care</b>                         |                          |           |                     |           |                  |
| Patient-centered                               | 5 (8.2)                  | 15 (24.6) | 17 (27.9)           | 24 (39.3) | 0 (0.0)          |
| Safe                                           | 3 (4.9)                  | 16 (26.2) | 19 (31.1)           | 18 (29.5) | 5 (8.2)          |
| Effective                                      | 0 (0.0)                  | 6 (9.8)   | 19 (31.1)           | 31 (50.8) | 5 (8.2)          |
| Timely                                         | 1 (1.6)                  | 3 (4.9)   | 13 (21.3)           | 38 (62.3) | 6 (9.8)          |
| Efficient                                      | 0 (0.0)                  | 5 (8.2)   | 13 (21.3)           | 37 (60.7) | 6 (9.8)          |
| Equitable                                      | 2 (3.3)                  | 3 (4.9)   | 33 (54.1)           | 21 (34.4) | 2 (3.3)          |
| <b>Patient Safety</b>                          |                          |           |                     |           |                  |
| Patient identification                         | 0 (0.0)                  | 7 (11.5)  | 33 (54.1)           | 19 (31.1) | 2 (3.3)          |
| Pressure ulcer                                 | 0 (0.0)                  | 1 (1.6)   | 24 (39.3)           | 26 (42.6) | 10 (16.4)        |
| Falls                                          | 0 (0.0)                  | 5 (8.2)   | 40 (65.6)           | 14 (23.0) | 2 (3.3)          |
| Medication                                     | 0 (0.0)                  | 5 (8.2)   | 41 (67.2)           | 12 (19.7) | 3 (4.9)          |
| Diagnostic test                                | 0 (0.0)                  | 5 (8.2)   | 26 (42.6)           | 26 (42.6) | 4 (6.6)          |
| Treatment                                      | 1 (1.6)                  | 7 (11.5)  | 22 (36.1)           | 29 (47.5) | 2 (3.3)          |
| Others                                         | 4 (6.6)                  | 3 (4.9)   | 40 (65.6)           | 13 (21.3) | 1 (1.6)          |
| <b>Workload of Medical<br/>Professionals</b>   |                          |           |                     |           |                  |
| Mental demand                                  | 10 (16.4)                | 23 (37.7) | 9 (14.8)            | 17 (27.9) | 2 (3.3)          |
| Physical demand                                | 8 (13.1)                 | 17 (27.9) | 18 (29.5)           | 16 (26.2) | 2 (3.3)          |
| Temporal demand                                | 9 (14.8)                 | 27 (44.3) | 13 (21.3)           | 10 (16.4) | 2 (3.3)          |
| Performance                                    | 2 (3.3)                  | 10 (16.4) | 32 (52.5)           | 16 (26.2) | 1 (1.6)          |
| Effort                                         | 8 (13.1)                 | 12 (19.7) | 13 (21.3)           | 24 (39.3) | 4 (6.6)          |
| Frustration                                    | 14 (23.0)                | 19 (31.1) | 15 (24.6)           | 12 (19.7) | 1 (1.6)          |

*Note.* N=61. Data were reported as numbers (percentages, %)

**Supplementary Table 5. Answers to survey part E. “Need for improvement in the policy”**

|                            | Triage  | Diagnosis and treatment | Decision of the main department | Discharge |
|----------------------------|---------|-------------------------|---------------------------------|-----------|
| Strongly agree             | 17 (28) | 16 (26)                 | 39 (64)                         | 25 (41)   |
| Agree                      | 28 (46) | 33 (54)                 | 18 (30)                         | 23 (38)   |
| Neither Agree nor Disagree | 9 (15)  | 10 (16)                 | 4 (7)                           | 7 (11)    |
| Disagree                   | 7 (11)  | 2 (3)                   | 0 (0)                           | 6 (10)    |
| Strongly disagree          | 0 (0)   | 0 (0)                   | 0 (0)                           | 0 (0)     |

*Note.* N=61. Data were reported as numbers (percentages, %)

**Supplementary Fig 3. Answers to survey part F. “Satisfaction with the policy”**

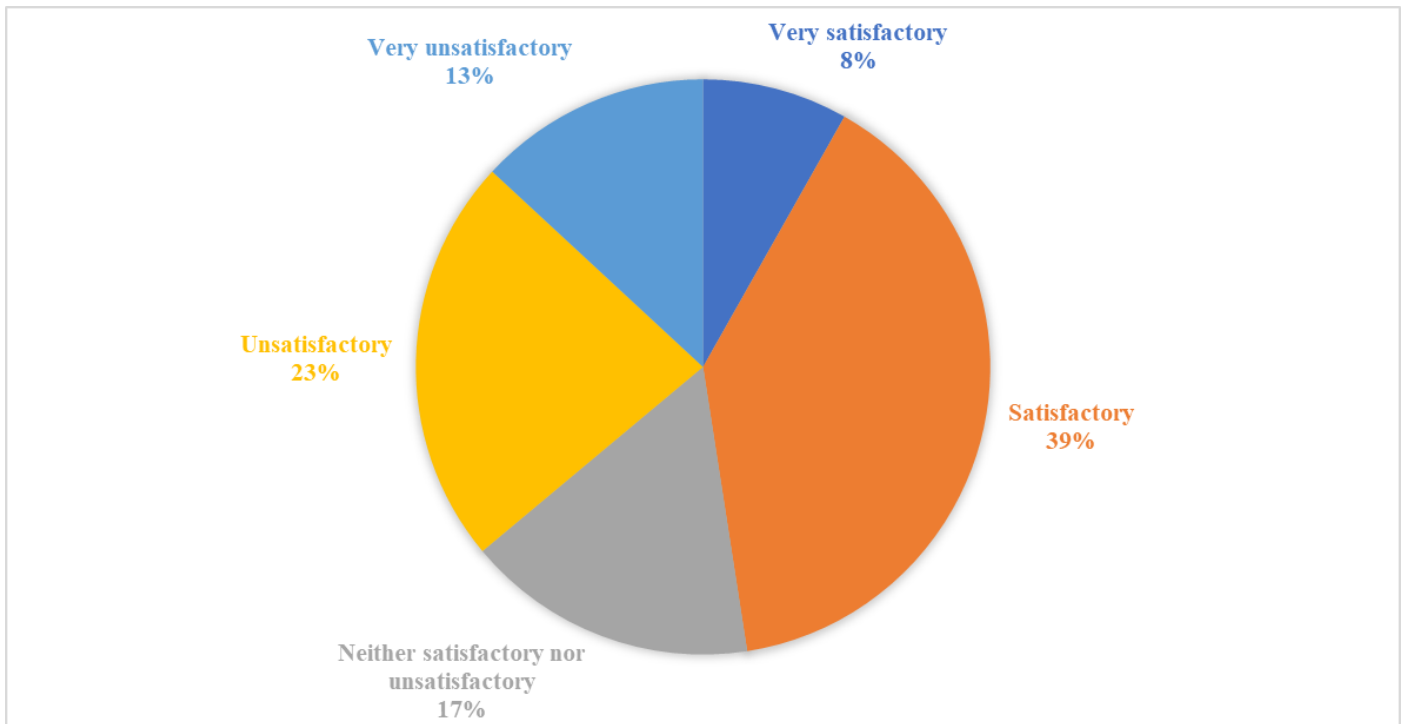

**Figure shows overall satisfaction of 61 medical professionals with the 24-hour target policy.**

**Supplementary Table 6. Answers to question 5. “Please feel free to write your opinion on the patient flow of the emergency department after implementing the 24-hour time target policy.”**

*Answer*

|             |                                                                                                                                                                                                                                          |
|-------------|------------------------------------------------------------------------------------------------------------------------------------------------------------------------------------------------------------------------------------------|
| <i>Pros</i> | Length of stay of patient seems to be decreased<br>Decision making process become faster<br>Easy to explain to patient and other departments about need of fast decision-making in ED process                                            |
| <i>Cons</i> | Decreased quality of explanation or consultation about treatment flow because of a lack of time<br>As the policy only applies in the ED, delay of admission or other problems of flow of another parts of hospital system are not solved |

**Supplementary Table 7. Answers to question 12. “Please feel free to write your opinion on the quality of care of the emergency department after implementing the 24-hour time target policy.”**

*Answer*

|             |                                                                                                                                                                                                                                                                                                                         |
|-------------|-------------------------------------------------------------------------------------------------------------------------------------------------------------------------------------------------------------------------------------------------------------------------------------------------------------------------|
| <i>Pros</i> | <p>Faster decision making due to time limitation</p> <p>Faster outflow of patients and faster inflow</p>                                                                                                                                                                                                                |
| <i>Cons</i> | <p>Insufficient exam and care for patient to hasten the process</p> <p>Increased revisit rate due to insufficient care</p> <p>Insufficient explanation to patient due to lack of time</p> <p>Unreasonable and forceful transfer/discharge</p> <p>Focusing on decision making and treatment to achieve the time goal</p> |

**Supplementary Table 8. Answers to question 20. “Please feel free to write your opinion on the patient safety of the emergency department after implementing the 24-hour time target policy.”**

*Answer*

|             |                                                                                                                                                                                                                                                                                     |
|-------------|-------------------------------------------------------------------------------------------------------------------------------------------------------------------------------------------------------------------------------------------------------------------------------------|
| <i>Pros</i> | Decreased fall due to faster admission<br>Improved wound care because of faster decision making and decreased time stay in ED                                                                                                                                                       |
| <i>Cons</i> | Increased transfer or admission at night-time due to insufficient medical staff, which can threaten patient safety<br>Forceful discharge or transfer increases<br>Urgent transfer or discharge at the last hour could threaten patient safety because of discontinuity of treatment |

**Supplementary Table 9. Answers to question 27. “Please feel free to write your opinion on the workload of the emergency department after implementing the 24-hour time target policy.”**

*Answer*

|             |                                                                                                                                                                                                                                                                                                                               |
|-------------|-------------------------------------------------------------------------------------------------------------------------------------------------------------------------------------------------------------------------------------------------------------------------------------------------------------------------------|
| <i>Pros</i> | <p>Easy to share opinions for fast decisions because of regulation</p> <p>Easy to explain to the patient about transfer or discharge</p> <p>Easy to cooperate with support department due to policy</p>                                                                                                                       |
| <i>Cons</i> | <p>The workload for transfer increased</p> <p>Time limitation itself can be a workload, particularly for departments directly related to the emergency department</p> <p>Workload increases due to patient complaints about forcing transfer or discharge</p> <p>Workload increases due to increased turnover of patients</p> |

**Supplementary Table 10. Answers to question 32. “Please feel free to write your opinion about the process that needs improvement to reduce the length of stay in the emergency department”**

*Answer*

---

All processes need improvement

Need to improve admission process

Need to improve contact and cooperation with other departments

Need to increase threshold to enter emergency department

Non-emergent procedure should be performed after admission



**Supplementary Table 11. Answers to question 34. “Please feel free to write your opinion on the overall satisfaction of the emergency department after implementing the 24-hour time target policy.”**

*Answer*

---

It is not easy to enforce the policy, especially for patients

The policy does not consider the characteristics of the patient’s individual disease consideration or preparation for procedure or surgery

Need more cooperation from other departments outside of the ED

More education for patient guardians and other support

Need to avoid transfer from outpatient clinics to the emergency department for admission due to lack of ward depletion.

Avoid transfers between hospitals that are not communicated, as this can result in an inflow overload in an incapable emergency room, which can lead to increased length of stay due to increased waiting time. It should be subordinate to other policies.
